# Supplementary material
Source: Elsevier journal article supplement (http://kenyonlab.ucsf.edu/mmc1.pdf)
Supplement: mmc1 [file mmc1.pdf]

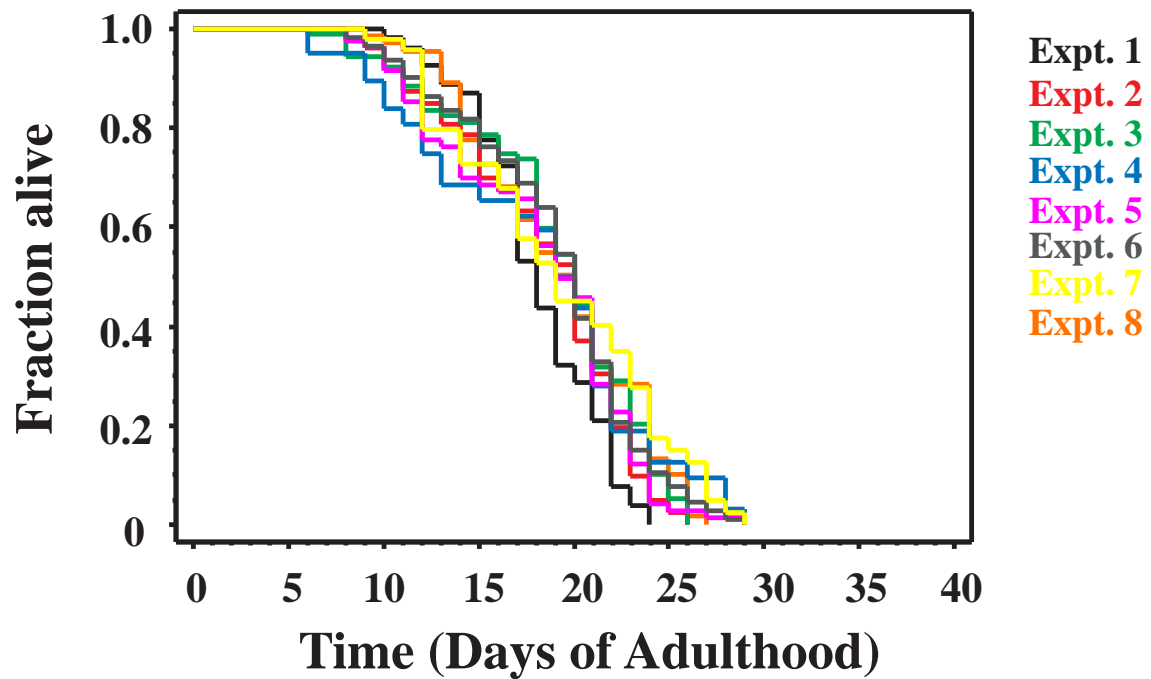

Supplemental Figure 1. Mean lifespans of N2 mock-ablated animals in eight independent experiments. The  $p$  value comparing the mean lifespans of the wild-type strain (control) in all experiments is 0.11, indicating that the controls behaved similarly in all experiments.
